# Supplementary material for: Genomic Clustering and Homology between HET-S and the NWD2 STAND Protein in Various Fungal Genomes
Source: PLoS One. 2012 Apr 6;7(4):e34854. doi: 10.1371/journal.pone.0034854 (PMC3321046; doi:10.1371/journal.pone.0034854)
Supplement: Table S1 — Sequence described and analyzed in the present study. (XLS) [file pone.0034854.s001.xls]

## Sheet: Feuil1
Genbank/NCBI accession number	species	alternate gene identification	effector domain	NOD domain	repeat domain	PFD-like motif	sequence	remarks
AAB94631	Podospora anserina	het-s	HeLo			Het-s PFD	MSEPFEIVAGALGVAGLFNNCVACFEYVQLGRHFGRDYERCQLRLDIAKVRLSRWGEAVQINDDPRFHSS APIDKSVQLAKSIVEEILLLFESAQKTSKRYELVADQQDLVVFEDKDMKPIGRALHRRLKDLVSRRQKQT SLAKKTAWALYDGKSLEKIVDQVAGFVDELEKAFPIEAVCHKLAENEIEEVEDEASLTILKDAAGGIDAA MSDAAAQKIDAIVGRNSAKDIRTEKRARVQLGNVVTAAALHGEIRISDQTTNSVETVVGKGESKVLIGNE YGGKGFWDN
XP_390776	Fusarium graminearum	fghet-s; FG10600	HeLo			Het-s PFD	MAEIFGIVSGALSVAAIFNNCVDTFEYIQLGRRFGEDFQRYQLKLDLAKTRLGRWGEAISINNEPRFSSF ASADKEVNIAREILEDIASCFEGAQKKSSRYADRADQGELEIFGESDMNPMLRRLHRHSKDIARQRQKTT SIIKKTKWALYDAKSLERTIDQICSWIDELEKLFPEQSAQTQLVEREIEKIDDKPTLEALKDAASGVDPV MEDAVQRKLNMIEGHNSAEFVNLEGSAKFLVGNVFSEKFLQRDVLLNDRTKNSMRTVSATNQSRLQVGNV YGGRGIWED
XP_388321	Fusarium graminearum	FG08145	HeLo			Het-s PFD	MAEVFGAVAGAIGIAALFNNCIDCFDYIQIARHFGDDFSKYQLRLDVAKCRLSRWGAAINVNSDPRFSNN TSKDQTTTLAETLLGEIVARFESAQKSSLLYKTVSRDQEMQVCSEADLGAVPQRLHSHLRTLTMHRQNRV GLTKKAYWAIYDKNEMGRMIDDIFDLINDLEKVFPATPQATSRLAEMEIQEVNDQQGLKMIQDTAQDLDP ILADTTKRKLQEITGQNTARCISGKGRTNIGHTFVNDSFVQSKGFCDSTFNHVDEINLDETARVNIGNTY GGKGFWDS
	Fusarium oxysporum	FOX17103; FOXG_17103	HeLo			Het-s PFD	MAEIFGVVASALSVAVLFNNVVDCFEYIQLGRNFGEDYQTCQVKLDIARLRLSRWGDAAKINNDSRFTEVKPSNNQVRVAKNTLEQLLNLFRNAHTESSN FKLGEGEEELALFDPSTNTNQAVVALRNTMRDLAHKRQKTTSLSKKISWALYKQKSFMRLIEDIQELLDGLEAIFPQQETYKRMVEIEIEEVGEGPSLQV LSDAAQETDDLLQEAASRRLEALGSSNAIDQAKVAETAKVKVGNEYIFQAVPSRTGITTNRIGDLDAQGRSRVLVGDSHGTKGFMDSD
	Fusarium oxysporum	FOX14669; FOXG_14669	HeLo			Het-s PFD	MAEIFGTVAGAISIAGLFNNCVDCFNYVQIARHFGQDFSRYQLRLDVAKSRLARWGASIDINNNRRFSLIEPADQTVISAQDILQEIVARFETARKISRR YETRTKEQGLRIYTEADLGPVSHRLHSRFDGITKQRYKSLGLMKKTCWALYDKSYMGRMIDDIIASIEDLEKVFPSTPQLTSQLVQMEIEEINDEQELEL IHDVTEGVDPVLSDASKNKSLEIAGKNSAGRITGPGRVNIGNSFLTESFPNSQGVRVDTVNHVDEINTAEPSRVHIGNTWGGKGFWD
	Fusarium verticillioides	FVEG13490	HeLo			Het-s PFD	MAEIFGTVASAISMAGLFNNCVDCFSYIQIAKHFGQDFSRYQLRLDVAKCRLARWGESININNDQRFSLAQPTDPMVVLAQGILEEIVARFEAAYKVSRR YTARTEEEGLSICTKADLGAVSQRVHSRFDVFTKQRYKSLGLMKKTGWALYDKSYMGRMIDDIIASIEDLEKVFPGTPQVTSQLVEMEIEEVNDEQELEV IQDAAEGLDPLLSDASKNKILEIAGKNTAGKITGPGMVNVGNSFVTESFSSSQGIRVSTINHVDEVNTTESSKVNVGNTWGGKGFWD
EEU42351	Nectria haematocca	EEU42351	HeLo			Het-s PFD	MTEIFGAVSGAISIAALFNDCVDCFEYIQLARHFGKDYSRCQLRLDVAKWRLDRWGAAIDINNDPRFRSG APANESVRHAQDILREIVGSIEGAYKVSRRYEQSTPDQNRVTLTHADLDPASQQLRNEFQTITKKRQDRT SLIRKTGWALYDKKRLGNLIDNIVTSIDELELVFPSVAQASVDLARAEIQKVDDQQSLHLIRDAADGLDP VLNDLAKQKLAGVEVQNFAARVKTSESGKFEIGNIFTKEASGQSVGFPYRNTNRVEDIEVKGDSGVHVGD TYGGKGFWG
EEU47148	Nectria haematocca	EEU47148	HeLo			Het-s PFD	MAEVFGIVTGAIGLAGLFQQCVECFEYVQLGRHFAQDFGMYQLKLDIAKRRLHRWGEAVNINDNPRFNAP GEDDTLVQEVQAILEEIALLFQTIQKSSKRYTIKAPKEDLECLTEENLQPVFRRLHAGWTNTTRRPGQKK VNFAKKASWALYDAKNFEKLIEQVSGFLDDLEMLFPAEELNRRRLVKLEIEDIADEESLTVLHQTAVEAD PLLADVVKEKVKVISVRNSVKVINSSEDANVRLGNDWSTAALNAAIEDRTRNEADSVFAEGSSVVHIGNR YG
EEU38121	Nectria haematocca	EEU38121	HeLo			Het-s PFD	MAETFGIVTGAIGLAGLFQQCVECFEYVQLGRHFVQDFGRCRLKLDIAKRRLNRWGEAVNIHENPQFTDT ESEEIQEILEEIANLFDTIQRSSKRYERKAPKEELECLSDENLQPVFRGLHARWAKISPPKQRDVSLMRK TTWALYDAKYFEKLIGEVTGFVDDLEKVFPAEQAQCHLVQIEIEDISDEESLTVLQETANGTDCLLAAAV KEKTNTISVRNYVREIQGEENAKVRLGNDWSTSALSTAIGLDDRTRNEAGSVTAKGSSTVHIGNRYGD
EFX05012	Grosmannia clavigera	EFX05012	HeLo			Het-s PFD	MAEVLAVMSGAVTVASLFSSCVDCLGYVQLGRHFARDYHVCRLQLDVAEMRMVRWKEVVNLDKDSRSFES DNRETQTIKTLLTEMEGVLTTVKRKAERYKRTASVADLKTCEDDKDMAAVPKKVHQRLRRVIGRRQESNL FVQKAAWALYDREQFKRMIAEVLELLDELEKVLQVEEACRQRAEAQISEVGDVASLQVLQEAARGTDPLL LDVVCRKGEALGSHNFARDIKAADQADVQVGDQFSQTVLMGGTGGGPAFHGANNTVHGLDAKGSAKVQIG SRFG
CAL30199	Podospora anserina	nwd2		NACHT	WD40	Het-s PFD	MANQVRSIHAEGQARVHVGNSYYGSSDFLPTADDAAFDSHAEEHNARCHRDTRTELLRQIREWADDPHGK TIFWLNGMAGTGKSTISRTVAKSFADDGILGASFFFKRGEGDRGKATLFFPTIASQLVRKIPALEAFVRE AINNNPDVARKALRDQFEKLILQPLDRIHHAIAVIVVDALDECDGDNDVKVIISLLSQAKELRSPGLRIF ITSRPELPIRLGFKNVTGEYQDLALHQIPEPIVEHDISAFLRHELARIRDDYNHQALEGIELLPDWPGEH AIQTLAQMAVPLFIFAATVCRFIEDPAWSDPADQLEKVLQYQMKAYDSELGKLDATYFPVLKQIIIGHTN PQKLLAAFRDVVGPIVLLVQPLSVLSLAKLLNFSTKSIYGRLNS…
XP_390777	Fusarium graminearum	FG10601		NACHT	WD40	Het-s PFD	MSSNSVASVFASDSSRVHIGNNNYLHQDTKDRDCIGALYETDPLRDRQQIIDTKGGLLPGASDWILTNDN FTRWREGEECFLWIKGDAGKGKTMLICAIIENLEHDDRNHVSYFFCQAGVPTTDNATSVLRGLVYGLVRY HPHNATVLSHVRKEFDSISERMFEGPNLWQIIRKILVTILKDPLMNHTVFVIDALDECEGNQAELLKFIV ETNTQLGIKWLVSSRKDPVIENRLRGIANSEKRLTIDLELNEHLTSGAVKNLIGARLRDMMWWDNCGDEL RDIIKHKLKQKSGNTFLWVAMVCQELNDCTATQALGALEQFPPGLDELYKRMVDKITASKSATQCKEIMA VVSASYRPLNLKELAIATNSLSQFQNNTAALTQTVLSCCSFLTL…
XP_388320	Fusarium graminearum	FG08144		NACHT	WD40	Het-s PFD	MDSNTCNTLQSLSVAGASRVQVGNNYNTTHNYNGESDQDDTKKLLESLHSTDPRHDKKNIEQTNNHLLRE AYVWILQNPEFLSWRDKNHGSQLLWIRGDPGKGKTMLLCGIIDELRPSTRLENSESHISLSYFFCQATNS ALNNATAVIRGLIYLLVVQQPCLLSHLRANIHWDSRVAIEDLFRKIVADPVLEEAYLIVDALDECREDLE FLLEMLSSPIPRIKWIVSSRNRVEIKEALKQSSSRLALSLELNEESVSQAVRHFIDHRTRDLARKKKLKA EVAQKVYRHLIQHANGTFLWVGLVCQRLTRCREWEISRQLLQLPKGLNELYARMMEQIRTSESCDSYIRL LAIVSTVFRPLTISELMAMEPLEVDEESICDFIRECGSFLTTRD…
EEU47147	Nectria haematocca	EEU47147		NACHT	WD40	Het-s PFD	MANNSVKELSASGRSQVHVGDNYISSSEDGKCMIDLRGTDPRRDKDRIEELKGGLLAKLCDWIFADACFT QWRNPESNRLLWIKGDSGKGKTMLVCSIINWLRTNEKATLAYFFCQKSDENLSSSAAVLRGLVYMLAREH DTIRELVQDEYKNAGRSLFWDRNAWYALKEILNTALQREGLGDIVIIVDALDECVTGIHQLLDLVIRLSS KTSRVRWIVSSRNEPEIEQHFDEFMDDPILRIELGTSSEAASFRTYLQSKVDELAESQDYDKETKMAVKL HLERNANANLHWVTLACQTLERAERGQAIDTVHQFPPGLDRLYLYLFRQILESFGHRPCQKVLAFAAVVS RPVSVAEFSCLAGIEENETAQLVGICHTFLTLQNETIYFVHQSA…
EEU38120	Nectria haematocca	EEU38120		NACHT	WD40	Het-s PFD	MSNTVHALTASGNANIHIGNRHYYNHGDDHCLSDLRTTDPRDDKKRIEGARGGLVKDSYRWILSHDNFRN WRDDQHRNLLWIKGDPGKGKTMLFCGLLDELGPTTRLVDQEAKTLLSYFFCQAADSRINSATAVLRGLIY LLVVQQDSLASHVQKRYKDVGKQLFSDENAWVALHDIFNNVLSDPSLEETYIMIDALDECVAGLPDLLNL IVKSTSSRVKWIVTSRNWPSIAERLDVATEVTSLSLERNQEFISAAVDSYIQHRVQKLAVRKKYNDKTKE AVRDYLSLNANDTFLWVALVCQDIKECSRRTVLSALKAFPPGLDSLYEKMVDRIRRLNKDDAKLCYEILA IVTVAYRPLTLVELASLVQPPEEESDDEEFLEEDIERCGSFLAV…
EEU42176	Nectria haematocca	EEU42176		NACHT	WD40	Het-s PFD	MEHSNSNHVGSMSAAGSARIQIGNTSTINNTTNNFSQTDNKKCLKALCSTDPRHDKIRIEQTNGGLLKDS YRWVLQSPEYQRWCDPKENHPLLWIRGDPGKGKTMLLSGIINEQEPSTRLENSETDTSLSYFFCQATNPG LNNATAILRGLAYLLVKQQPCLISYVRDKASLNPEHWNSGVAIRDILSKILGDSALQNVIFVVDALDECV TDLELLLDFISSTTSTKVRWLVSSRNIWEIEQRLKQTQTKLALSLELNAESVSQAVNYYIKHRVHDLGVT KDFRSEDLRLAKRYLSQNAHGTFLWVALVCQQLERSDPWEVKDYLELFPAGLNELYGRMMDTIRSPVSSD LYIRILATIFTVYRPISLSELMAIQNIPGDEDMLPKIIMKCGCF…
	Fusarium verticillioides	FVEG13488		NACHT	WD40	Het-s PFD	MESSTSSTVQSLNASGSSRVHVGNNYSITHHHGRGSEDDGAKKYLDALRSTDPRDD KARIEQTNGGLLKDSYVWILDSPEFVTWRDESKAGRLLWIRGDPGKGKTMLLCGLVNELQ PLTRLDGSQNSKTMSYFFCQATNSGLNNYTAILKGLIYLLVIQHPPAVSHLDDEEDKDHW NYKVSLESTFRKILDEPGLGETYLLVDALDECVEDLPLLLALISSTSSRAKWIATSRNRC EIEELFGEASSKLALSLELHEGSVSKAVDSYINYRTHHLAKIKKLKKSTLQQIYDHLSQH SQGTFLWVALVCQRLERCRAWEILSQLLQIPQGLNQFYAKMMDQIHKSASRDLYIRILAV ASTVFRPLTFAELIAMESLEIDQETLPDLIAECGSFL…	manual annotation
EEQ35356	Arthroderma otae	EEQ35356		NACHT	WD40	Het-s PFD	MSGLEKDTEIMAGHSYKNIQITGDARAQIGDIIHYHDRVLNRGLEQGNPLDTDCQCLNDLWPDNPDYEKE GIQKSKGGLLKDSCIWVLKNPEFLRWRGDQQSRLLWVRGDPGKGKTMLLCSIIDELKKSNSEKHNLSFFF CQATNSQYNNATAVLRSLIRQMVNQQPSLIKHVRKEYDNYRDIFKRINAWITVCDIFKNILEDRTLNHNF LIIDALDECTTGLTDLLNLVRQTSATYSNLKWIVSSRHWPSIEDSLNMAAQKSLLSLELNEESISAAVAI YIKHMVEKLAKEKNYSKGTEDKVHRRLSLNANNTFLWVALVCRELARREVRLHHIDSKLDAFPPGLDQIY QRMMDQISNSEDAILCIRILAIVSVVYRPITLDELMTFIDLPDG…
CAL30203	Podospora anserina	hnwd1	HET	NACHT	WD40		MRLLERNDTGDVSLTGDIPDNQVPPYAILSHTWGDEEVSFEDVTDSTRKNKRGYSKIQFCGDQAGRDGLK FFWIDTCCINKSDCDEFQEALNSMFRWYRNAAKCYVYLTDVSTYQQDANSNPGWELAFQKSRWFTRGWTL QELIAPTIVEFFSEDRKRLGDKKSLAQHIHNITGIPLGALQANKLSDFSFDVRMSWIKHRSTTREEDRAY CLFGIFNVQMRLLYGEGEERAFERLREEISKYDRCLSSLHSTDPRLDKKRIEETKGGLLDDAYRWVFDTP DFRGWHDRSESRLLWIKGDPGKGKTMLLCGIINELEGIIIADGHCRNLAYFFCQATDSRINNAIAVLRGL IYLLAHQQPRLISHIRKYTDKAKSLSDANAWFVFSDILGGMLGD…
CAL30202	Podospora anserina	hnwd2; het-R	HET	NACHT	WD40		MRLLERDDTGDFHLKDLPSNAIPPYAILSHTWGDEEVLFKDLVDGTGRKNAGYAKVQFCGDQAWRDGLKH FWIDTCCIDKSDAVELQHALNSMFQWYRNATKCYVYLTDVSTRKWDADGNSGWELAFRTCRWFTRGWTLQ ELIAPTIVEFFSKECERLGDKKSLEREIHDITGIPLKALQGRPLSDFSIAERMAWIEKRDTKFEEDKAYS LFGIFDVHIPVIYGEGKQKALKRLRDKIREDYLCLAKLWSADPRDPHHEKERIELAKGGLLADAYRWVFD NPEFRQWRHNSENRLLWIKGDPGKGKTMLLCGIIDELEQPITASGGNLAYFFCQATDSRINSAIAVLRGL IYLLARRQPGLLLYLPENTYASDDAMAWVVLSKVLRRMLEDPDL…
CAL30201	Podospora anserina	hnwd3	HET	NACHT	WD40		MRLLERDDAGGIRLTKDLPSDKIPPYAILSHTWGPDEEEVSYKDLEDGRAVSKLGYNKIQFCADQAGRDG LKLFWVDTCCINKSSSTELQEAINSMFRWYRDAAKCYVYLADISTHKRNVDGSFASEQTFLQCKWFTRGW TLQELIAPTIVEFFSKEGAYLGDKLTLGNDIHSVTGIPLEALRGTTLSNFSVEERMSWAKKRKTTRKEDK AYSLFGIFDVQMPLLYGEGEEKAFRRLREEINKVSKSIETYGEVDARCLSDLRSTDPRHDKKRIEDAKGG LLKDSYRWVLDNPEFQRWRDGDDQRLLWIKGDPGKGKTMLLCGIIDELEVSTPTSLLSFFFCQATDPRIN SATAVLRGLVYILIKQQPTLISHVRQHYDPAGGRGFEDPNTWVV…
CAL30216	Podospora anserina	hnwd4; het-D	HET	NACHT	WD40		MRLLERNDTGDFSLTDDIPDDQVPPYAILSHTWGDEEIIFKDIKDGICKKKRGYSKIQFCGDQAGRDGLK FFWVDTCCIDKSDSTEVQRALNSMFQWYRNAAKCYVYLTDVSTCQQDTDGNFGWWELTFRKSRWFTRGWT LQELIAPVIVEFFSKEGERLGDKKSLEQQIHDITEIPLEALPGNTLSDFSIEERLSWVGKRNTTQKEDKA YSLFGIFDITMPLLYGEGEDRAFGRLREEISKHDRCLSSLHSTDPRLDKKRIEEAKGGLLTGAYRWVFAN PDFCLWRERSESRLLWINGDPGKGKTMLLCGIINELQGAIVADGHCRNLAYFFCQATDSRINNAIAVLRG LIYLLAHQQPRLISHVRKYTDAGKSLSDANAWFALSDILVGMLG…
CAL30215	Podospora anserina	hnwd5; het-E	HET	NACHT	WD40		MRLLERDDAGEIRPTKDLPSGKIPPYAILSHTWGPDEEEVSYKDLKDGRAVSKLGYNKIRFCADQAWRDG LKFFWVDTCCIDKSNSTELQEAINSMFRWYRDAAKCYVYLTDVSTDKRDADGDPSWKWAFQKCKWFTRGW TLQELIAPTSVEFFSREKARIGDRNSLERMIHDVTGIPLEALRGSPLSDFSVHDRMAWMKQRNTTREEDM AYSLFGIFDVHLPLIYGEGKEKALERLREKIGKDDGCLADLRVTDPRHDKKRIEAAKGGLLKDSYCWVLS NVQFQQWHDGDDQRLLWINGDPGKGKTMLLCGIIDELKKSTPPGLLSFFFCQATDSRINNATAVLRGLIY LLVSQQPALISHVRRPYDHAGKKMFEGPNVWIVLCEIFTSILQD…
CAL30200	Podospora anserina	nwd1	NAD	NACHT	WD40		MDQYNSEDSKIQLRKLIDVAGALEKQQEKRHQDDGDKQCLRDLLETDPRDDKTRIEDTKGGLLRDSYRWI LDHADFQRFRDDPQSRLLWIKGDPGKGKTMLLCGIIDELKKGPNSLLSYFFCQATEAQLSNAASVLRGLI YLLILQQPSLISHVRSKHDVAGEKLFQGINVWVSLVEIFTDMLKDPTLKDAVLIIDALDECTTDRPKLLD FIIQSLTISSSPVKWIVSSRNWQDIEEKLDRIEQKVRLQLELNQDSISKAVDTYIECKVEELAGLKNYDK KTRDAVKNRLTSNADGTFLWVALVCKELADPKARKRHTLSRLHSFPPGLDSLYGRMIEHIRDSEDADLCK EVLAIASVVYRPVTLDELKVLAESLEDIDPDDLKDIIGSCGSFL…
CAP64781	Podospora anserina	nwd3	SESA	NACHT	WD40		MSGAEVIGIISGIIAIVDATAKVYNAANDALGLPEAFRDIVIRLPLVRKTLQTVSRNLNNTNPDEEYCKA IKPVLERCENRATQLDKIFKSVVPQADASRMERYVHAVRTLGKGDTVETLMKGILEDVQLLTSNRVAELP TETSVAAVIREAIEEVSAIPTSLPQGIHLSATCETERDSLLKDLRWTDPTIDKLRIERTKGPLYEDSSRW ILSHPNYQKWRDGETKLLWIKGGAGKGKTMLLATIIKQLQSRTKPDHTATSSLLSFFFCQNTDDRLNNAV AILKGLIYLLLIQDVNLVLYLKTDYDRMGREIFDATKNVNAFDVLSNVFRQMIQHSRSETVYLAVDALDE CEDGLPNLLGLIRDTVLQQNRLKWIVTSRNGVDIDEGPALENPG…
CAP62256	Podospora anserina	nwd4	SESB	NACHT	WD40		LSPDDQHVFRPRTFLLHQVTYRDGKYGPYPFNAQSADNVFAPQLQKFRTSFHVKPPALDPDPFGLTLIHD ATNSVGDIIFVHGLGGSSRRTWSWNRDPAIFWPSWLRHEESLSHYRVFSFGYNANFRESGTPLSILDFSK SLLVRMRAYGQMDTAFIGTKPIVFVAHSMGGLVVKKALLLGKNDEEYCDMVARVHGIMFLSTPHRGSSHA ATLNSMLSVIGSSSKVYVAELNPSSTSIEDINEQFRVICAPWQLVSLYETQQTRLSPGLRRMIVDKGSGI LGYPKEVSAPLDADHHTICKYRSRLDSNYLLVVDLLRQLTRGIGSHHSTIAPNVLHKQGTSHVEMLESIL GVKGNIRRVLDYHLADALPGSCEWLRRDARFAEWIDTSGQSPHV…
CAP61990	Podospora anserina	nwd5	RelSpo	NACHT	WD40		MDAHSQAPPQAGDGDAPNQSLRVKINQLTEGPVSPDPKSAFVNHVWPKLLNEYDAMRERLEEFCKSALER RAIDCQVKSRTKQVDSIRKSLDRREKALLDRSQKQFESFSDILINIHDLVGLRIILEFADDMERAVCFIN ESFRKEEEPVIFVRDREVGRSWKTRFGAYETRNYRVSLEKAKCGALSQFCDVMFEIQVTTIAEDLYNKLA HPLLYKGSSLTRQDEIVIDMAHGNALCYALCLAYMEDKLKKRANNIGGRAELATATEEIARDGTRFRKSL TKGASFDTPVSPHGLLEALEIPPEGYNSIDDLKQWINRKLTYGLPPIPSSKLPIVNGATFDSHTDEHDAR CHPDTRVGLQRDIMAWADDPQGECIFWLNGMAGTGKSTISRTVA…
EEQ35355	Arthroderma otae	MCYG_08174	HeLo			Het-s PFD	MAEPFGIAAGTVGVAAAFTACIDCFEYVQFGRNFGRDFQTDLLALNCAKLRLSRWGEAVKIYDDPNLGKR DASLAEIQVAKDTFYQILVLFSNTQKISEKHKMKARDREDLSVFAPCDIDPTVTALADNMRALVIRRQKG SSVLKTASWALYHRSEFKRLIEDIVSLISNLEKIFPEPQLQLIADEEAAQVHDKSSLKLLETAARDVDPL LETATKKGHKYSNFVVKGKAHTGDAFHGDWHGNANGASHIYDGVEVGENGKVLVGNKYGGKDFWDD
EEQ27527	Arthroderma otae	MCYG_00415	HeLo			PP - motif	MAEAVGLAVGIIGLAGLFNNAVQCFEYVQLARSFGRDFQSSQLKLDSAQLRLSRWGKSLRLDTQQLDDTQ NTISFPGSTEDAERAKSLLDQISFPGSIKDIERAKYLLSHILELFEDAETLSSKFKDKQSLDDGSTATFD PETDLKSTVGALHRTMRKLATGRQNKANLKQKAKRALYAEKTLRRLVEDITEHVDDLTDLFPATLPRQKR LCEAEASEIGKHSEAVEDLKKIVAQQDKLLHAALEKSNNIPQAGMHIVFSGANNKGFQAGQNFGSQTINY NGTTKNMGAK
EFQ97060	Arthroderma gypseum	MGYG_00104	HeLo			PP - motif	MEPAGLAVGVLALAGLFNNAVQCFEYIQLGRGFGSKFQTCQLRLDCAQLRLSRWGRSLGLDVAQPQQTLP DFPGSPEEVKLAEGLLGQILDLFEIAEFRSSQFKKRASPDDDTLATYDSQTDLEPTFGFIHRVMRKLAID TQKQATLKEKTKWALYEENALGRLIEDITKHVEDLINLFPTAKPRQQELCKAEVSEIEVHEAGARVLREI AAQQDKLLETMLMKSGNNSAQPQPAISAVFSGSNNKGVQLASNSGTYTMGNMTFGKD
EEQ27528	Arthroderma otae	EEQ27528		NB-ARC	TPR	PP - motif	MAQPSSSAHFSGDNNSGVQAGSIHGSVTINNHEGQRPETPPEPSCKIPFKRDDEFINRPAIFDKIKEKLE APGSRVALVGMGGVGKSQIAIQYAYCLENQLSDTWIFWIYASNSARFQESLEEIAHRGKIPGRDDPKRNT LGLVRNWLLDDKRKWVVILDNADDLDFLKDTSTEEGTNNKRLDKYLPKTQNGSIFVTSRSREAALQLVDR RNIINVHPMDETQAVSLFRKKLNEGYDDKVIAELAAELGYLPLAIVQAASYISLREPRCSVQEYLEDFRG RNLTKKLKLLSDDNGDHRRDEEAVNSVSATFKISFNRIRKTRPSAADLLAIMCFFNRQGIPDYVLQPEGI ECETTPRKKEDSSTPGLPARDESFENDIRTLISYCFISTGANPK…
EFQ97059	Arthroderma gypseum	MGYG_00103		NB-ARC	TPR	PP - motif	MAHPTISAVFSGNGNAGLQFGNNSGTLNYNPTNNNTTINNTTNNNTNYNYPEPRPETSPKPSCKIPFNRD KEGFVDRVTIFDEIEEKVKAPGSWVALVGMGGVGKSQLAIEYAYRLRDQLQLPDTWVFWIYASNSARFRE SLEEIAEHAKIPGRDDPEPGILKLVYRWLDDEKRKWVIILDNADDLDFLEDTSVKGGKPNKSLTKYIPKT ENGSVFITSRSRETASALVDNKHIIKVNPMDEAHAIDLFQKKLPKPDDKLIAELAAELEFLPLAIVQAAS YISHKEPRCSVQEYLDDFRKMRADEKLMLLGEKGRDHRRDRDAVNPISDTWKMSFNHIQRTRPSAADLLA LMCFFDRQGIPEFALHPSDTEREIGLSPSDSTPGPAARDISFED…
AAS80313	Nectria haematocca	sesA	SESA			σ - motif	MEATVSELISSTIKSLEEGIRCHKDVEDDNGLREAFHEAGRGLSVVNQALQAAQGNSAREPQSAMNPLRV CNTKANISASIFKAVAQAPKTSRFEGYKEAVRQEGNGQTVEVLVVGMMKDVCALAENFAIQDQVKKLHET IEKLSAMKPSLPKEGPGHTFTNIGNGNQYNATDGPQNINQGGNQVTGGTFPGTVNFGSPWPQNPPFEHRN
AAS80314	Nectria haematocca	sesB	SESB			σ - motif	MRRLQARFSRRKQPRTGGNSPEIHQQQETSHGHDPPGPPSRHDIDLRPPSESTLVPSFPDGVKVLHDCRD ATIDICFVHGLTGNRDSTWTAHGQSKPWPETLLPPKLSRARVLTYGYDAYIMRKSVASTNGLIDHAANLL NDLSTDRACSNASSRPLVFVAHSLGGLVCKEAILLSRNNPEPHLRGIFDCTKGIVFLGTPHRGSWMADWA SIPASALGIVKSINNSLLEILETDNKYLQSVQDRFWSMVREQQNAGRDLGVMCFFEELPLSGVGKVVSKD SATLESYSAISIHANHSNMVKFSSVDDNGFKRLLGELIRWESQIRDSTARQPRRPIEEAPTRKLATSSFN NLGSGDQFNTPGGTQNINKGGNEVSGGNFYGSVQFG
AAS80312	Nectria haematocca	het-eN		NACHT	ANK	σ - motif	MDNRSNDIDAAAKGTCEWLLRHKTYIRWASCGRGLLWIKGKPGSGKSTLLRNVLNNATPRLKTEEGALIL SFFFHGRGSELQKTPLGLFRSLLHQLLRQASKALEDKDLLSIFQQRCETIGKPGEKWQWHPSELPRLFES SLPKVLETHPVWLFVDALDECGKENAVKLVKVFKSLLQGLPSSDSKEFCICFTCRHYPILDLGGVFEVCL EDENRKDIATFVQHELSSFRERMLSTIPVLITQRADGVFLWAMLVVKKVLDLELEGAGLKEIKAAILSVP QELDALYRQLIQSMSMDSLKLVQWICFAMRPLSLEEWRWAMLIDADCPYRSLHECQTAADYPSDDDGMKR RVQTLSRGLAEVTSDVKVIQFIHQSVKDFFVEKGLSALDGSANP…
XP_383255	Fusarium graminearum	sesA; FGSG_03079; FG03079	SESA			σ - motif	MTASVDSTLSTAVEPYIRRTVTALRSAASEHDAVKEDTTLQEAFHEAGRTLPLIQKALEESPAELQGVTQKTLESLRECHVKAEICKAIFLAVADAQPEK RQEAYKEAVQKRSKGRTVEELVIGIATDICGLGEILVIQKHVEGLRGAIDRLSKMEPSLPKAKTDGVFNNYGTGDQLNAPGGTVNKSTGSGNQFPGANFS GSVYFDKEGSREHGP
XP_383254	Fusarium graminearum	sesB; FGSG_03078; FG03078	SESB			σ - motif	MTSTEPSSLSDRLYNISPMKRLRAKLSWWKQHRTGGNSSEIHQQQETSHGPPSESIPVSFFPDGVEVLHECRDAAVDICFVHGLTGSRVSTWTAHGQSKP WPETLLPPKLSRARILTYGYDAYIVRKSVASTNGLIDHAANLLNDLSTDRAYSDASSRPIIFVAHSLGGLVCKEAILLSRNNPEPHLQGIFDYTKGIIFL GTPHRGSWMAKWADIPASALGVVKSINKSLLKILETDNKYLESVQDRFWSMVREQQKAGRDLEITCFFEELPLSGVGKVVSKDSATLESYNAISIHANHS NMVKFSSEDDNGFKRLLGELIRWESQIRNSVAGQPRRPIEETLIHKSANSSSNNYGSGDQVNAPGGTVNKSTGSGNQFPGAAFHGSVSFGSPSPQN…
XP_383253	Fusarium graminearum	het-eN; FGSG_12516; FG03077		NB-ARC	TPR	σ - motif	MRRASQSRADRQQEETGQAGRSSQGASFNNHGSGGQINVPDGIINISTGHGNHLNGSNFNRDVYFVENGHFQLRREKPNARKPCFCVPFVRDRDFVDRPD ILTWLKEQYAGSAGRMALVGMGGFGYGPPREHPSRITFALTDKSKSQVAIEFAHHVHDEAPQTSVFWVYASSKLRFEEAYRSIADTLQLPRRNNPDVDVL RLVRDWMQTEEAGSWLMVLDNVDDVNLFHPSANASENKAANQPTGENAIASSDQRPLAAYLPKYRSGTILITSRSMDAAERLTGSHKAIYRVPAMDDTRS LRLLQNKLNGDFDKDAAVDLLRALDYIPLAITQAAAYINRRAPRASVQTYLDAFRESDKKKGSLLNRDAGDLRRDETVSNSVVTTWQVTFEQIHQE…
EEQ35656	Arthroderma otae	sesB; MCYG_08475	SESB			σ - motif	MAGFFDPLCNPKDANLDIVFVHGLHGDRVDTWTKYGIFWPRDLLPDDVRQARVLSWGYSADIAHFWQKTT NTELNDHAKNLCSDLSGLREQSVDRPIIFVVHSLGGLALVFSDRSADQHLKNIADCTRGIIFLGTPHEGS DKAKWVKRGQAFASLIGRDVNKEVHDILSEGSSRLSELDSTFMNFLRSRRESKDLKTASIEVIVSKASAS ITGYETQSIPADHRDMCKFASKDEDGYQRISRVLKRWAVMLQSPQPPEQRLGDTVTMNVGKNMGQMTGNL HGDNHVTFNYTLSS
EEQ35657	Arthroderma otae	MCYG_08476		NACHT	ANK	σ - motif	MVSTESNNAITGNRGFPSPTMNCSVPTNNGQIIGSIQGNQTNNFYYETSSQQREIYHQLFRLANNSTDGS YEWYKDRIEERVEGTCNWLLDQAAFKDWTRRDSGLLMITADPGCGKSVLAKYLIDDKLPELSSATICYFF FKDQDQNTLNQATCALLHQLFSHKPLLIRHAMPEYSKNGPDLVNITSSLWNVLVAAGRDPEAGPVIFILD ALDECRGSDLRNLLQRLKNQFTQNGGFGMVRFIATSRPYSHIMSEYRGVADAFPCIHIPGEEESDAISEE INHVIRHRVNQLGKKRELRSEIKCHLENRLLTNPHRTYLWVYLVFDYLETQDFKRTKKGIEFPIDTLPNS VNQVYENILSKSKYRDIVRKALCIILGACRPLTVGEMNMAMNVN…
EEQ31823	Arthroderma otae	sesA; MCYG_04642	SESA			σ - motif	MSDVDIPTLIMITIIPLNSATEWYNTVKDDKNLREAFHGAGQGVLLVKKALDATKAQPDGCSLSGEPASV RSSLLACNAKSKSVESIFKEVALAPKDSRYDRYQAAVRREGKGDAVETLVGGMMEDVCDMVKGSTIEAAM ESHVKELREAIEKLSKMEPSMPSEPRQDSKYVHYGSGDQFNAPGGTQNKSSGNGNHFPGATITGNLNFGH IPAVEDSKNLLSK
EEQ31822	Arthroderma otae	MCYG_04641		NACHT	ANK	σ - motif	METFEASSGGSSSINQHHGNGIHFTGANIQGDVNIGGKMNKAPESIQNRCLRSLSFTSMGERSMMIDTAT DGTCEWLFQHATYKTWVASNCGLLCIKGKPGSGKSTLLKYALDSVEKAYNAPGNNAIILSFFFYGLGDEL QKTPRGLFLSLLHQLFREVPGTLPDLLATFERRCEERGKPPKAWQWHVNELQAFFQSSLPKVLKCRPIWL FVDALDECGKGSAIKLVNTFKPWLQKLPPAGFQFRVCFTCRHYPILDFGGGLEICAEEENRRDISIYVQA QLSTIPGPVRDLIARSASGVFMWAQLVVTRVLDLEREGAVGRGKNRVIPKELGDIYKQLVKGMNEKSTSL KLIQWVCFAERPLSLDELRWAMVVDAKLDSPFKSLEESEDAASF…
EFR01950	Arthroderma gypseum	MGYG_04951	SESA			σ - motif	MRPTKFDDLISGTIASLGAAAGAYDIMRNDPDLPATFHKAGQHLGHVQQALQTIVNLLKWRDLAGDVIQI IPSLEDSSKKAKVLEDILSEVASQPESSRKSRYVSSVRQLGHENTIEALLLGIMRNTCVLGEDEAIKAAI DDQVRGMHGVMAELSAMEPSVPVGGGESRFTHFGSGSQFNNAGSGKQFNNTGSGRQYQAEVMHFKD
EFR01949	Arthroderma gypseum	MGYG_04950	SESA			σ - motif	MSGIEAIGLISGIISIVDTAIKLHDALKNADCLPRAFQEVALRLPVVKDTLTTVKGHLEENGGDAATFQA IMPVIEGCSDNAEALKNILQEVMVSPDHSRLQRYRLAIRRLGKGSQVEELMKTLLENVQLLAGNRAIKAA TEAQVSEVLEAIHALSDVPPSAPDTPGSVSFAHYGTGSQFNNADGGTQNNNTGSGRQYIAHSMTFGSD
EFR01951	Arthroderma gypseum	MGYG_04952		NACHT	ANK; WD40	σ - motif	MDLKRRPSEDLANSAKSLRIEDEKGDQYNNADSGSQYNNTSAGRQYVADQINITENRIERKGENLEFLKD LRLTDPRDDKSRIMDTKGGLLAKSYEWIVDFGDFKKWRSDHSSGVFWISGSPGKGKTMLLCGIIDHLSDP GAKHIPPSFFFFQESDSQLNNATAVLRGLIYLLAIQHRSFLEYLQERYSLSGGTLFADPDNFFALSNVFR NMLSIQTTNPIYLIVDALDECQTDLRKLLDLICQTSSTPSNCVKWIVSSRNLYDIKEVLGPLEHKVYLSL DQNEGLISTAVNTYIDHKVSQLSRAKRYSPEVKAEVQRYLKQNANETFLWVALVCQRLSGIKPWNTLTEL HKFPPGLEDMYGVMLGQMLKLDDDDLDFCKSILAVAMIAYRPIT…
EFR03975	Arthroderma gypseum	MGYG_06978	SESB			σ - motif	MERFKGFFSSKKKKWLKSASSSDSTLPAQPGSSRRSQTPPSVNFPDGVEVLHNCPDASVDICFIHGLTGD RDKTWTGDGQSRPWPETLLPSQLPRARILTYGYDAYVVRASVASSNRLIDHATNLLNDLTTDRARNGVVS RPLIFVAHSLGGLVCKEAILLSRNNPEPHLRGLFEYTKAIAFMGTPHGGSSLAGWVKMPVSAFGLIQTGN KALLQLLQTKDQFLESVDVSFSSMIREVREAGRRFEVTCFFEELGKAGVGTIVSKESATLESYNSFSIHA NHSDMVKFSSAEDTGFQRLLGELVRWESQIGGDSAARPPGEEEAAKADRPVSTRAAVPVAISHYGSGNQF NALGGSQNNNTGSGNQFLGNISGPVTFAYK
EFR03974	Arthroderma gypseum	MGYG_06977	SESA			σ - motif	MASKGFTALISITISILTSITRDCYTVIEEDKTLRDSFHEAGRGLPFIEEALRAIKSELNGRDINELTTA SLETCSSKSQIAERVFRDVALAPADSRCSLYTATVRREGKGNSVEELVKEMISDVCNMVKDSAIEEPLKI HIKALRKAIKKLSNMEPSVPEEPSDGGISYHGSGNQFNALGGTQNNIQTVASNSSATSLGV
EFR03973	Arthroderma gypseum	MGYG_06975		NACHT	ANK	σ - motif	MDGSTPSSQSLLFQQLADNGRQFNTTGGIQNNNTGSGHQFIAETINIGTKPSSALLHSLSFKEMGTRFKD IKSAAKGTCEWLLRHDEYKAWATRDRSLLWIQGKPGSGKSTLLHYALKNVNTTAAKKDNTIFLSFFFHSR GGELQKSLLGFFQSLLHQLLQHLPEAPADLQTDFDEKCKNYGEPGQQWKWHLTELRGYFRSSLKEALKSR SIWLFVDALDECGKDGANKLVKDFKSWLQGTDEDSDHPSSHFQFRVCFSCRHYPIQVLDYGSIICVEEEN TKDISTYVHTELSWIPDDIREIIISHASGVFMWVRLIGEEIDSSLGRGEDWEMIRKNIMSAPEKLSDLYA RLVQRMKGKKTKSDSLKLIQWICFAMRPLSLSELRWAVIVDPEV…
EFR02206	Arthroderma gypseum	MGYG_05209		NACHT	HEAT	σ - motif	MEGQLNLAQVPPCTVTATEASEALKAYYTTGSLLKVERLSGKILPMESCYINLAVVRLDDTPAPHKSQSS PFSLTRNVGIELDGEDVKLCDLFNSINLSNGEKGSPKRILIRGRAGVGKSTLCKKIVHEYIHNGMWNQHF DWLVWVPLRILKNIETHGPYTLGDLFTQYFSTNPNTKDLAECAWRTITGPAKDRTLFVLDGLDEVFGQWN EGEPIQVFLDSLLAQDYVIITTRPYTLDRERLEPIDLELETIGFRPEQVMGYLENKGIVPEIVTKEIQFF LEQRPIVRELVLIPIQLDALCHSWGNAFKNEAPETMTEVYLAIVNKLWSKDRHRLQRANMETEKEAREST SPESKEEVKEAMNLIEGIAFDGIYNNKVEFGKTEWDQTHRFLKT…
EFR02207	Arthroderma gypseum	MGYG_05210	SESB			σ - motif	MAGAEEPPIRDDGLNVIYDNGKNAKYDIIFVHGLRGHPRRTWEAVNPSDPAEKVFWPKDLLPTTFPESRI FSFGYLSEFVTFYPSLAPITHTSIDNISTTLIERLDTKRRATHTEQRPLFFIAHSLGGLVCANALSQRYS PNFAGREVVAHTRGVIFLGTPFQGSSKVTWAKTAERLCRLVADSNDQIIRDLDRKSDILKKIGTDFLIFV RDRYVTRNEYLLQVACFFETKSTKIKIKGIKTDLGHIVTEDSATLANYKPIAINADHRTMCHFPDCETTG YIDVTGKLKQMIANMDKGVYSLKEAGRSITVSDTYFGENFHNYGIATGNIIGTTPNANNLTVSPTSCGG
EAA64853	Aspergillus nidulans	AN2021		NACHT	WD40	PP - motif	MATSTAFNAANHGLQIGNNSGSITAEFHVARAYTTEDIDRICLHALRCPDSLAVKNRLKESKDRLVYQSI QWILEDAQYKDWENGDDVGLLWIKGGAGKGKTMLSIGLIEQLARAQDDSTVVIYSFCQNADYELNTLEAI LKGLILQLANRQPELKESLRRRWDTIQESFSEDVTSWQSLWNILFEMLARCKYSRVYMVVDALDECQDND MVDFLKSIVRKGLDQPGKVKWMLTSRPWDGAERVLLAGQDQVQINLDGEHNSQSVSGAVEAYITSKVEEL SRQHKYGATLKSEIETELTERSEGTFLWVSLVCKALESVSRDDALSTVQSLPPGLHPLYDRVLNQLNEGE LAEVQKCMRLLKAMMTVYRPLKVEEVASVIGLTDEEDTIRALVD…
EAA64854	Aspergillus nidulans	AN2022	HeLo; Goodbye			PP - motif	MATQGKLDAAQASDISQLWQQAVKNYEKKTKKSLHLAQFSNIDQIMKGTEGLSSEFKDFRHDRSKTDNVR TALKNNLWLIQKVVNTVEVVGNAASAFPPAMPASLIFTAFGQVMQSFAAVSADYDKIMGFFDFTHRFFDR LSMIEDKTPQQAPFQRCVARVFSGMLTICSMAQEYAEKKRFKKWFSSLIDGSDGALSSAIQEMEEAVNEL TQAVGLATLRTVEILDDIVQSMNGNVEFLVAQVTVIDGRMKDIKSDTGTIIEQTQTLELKQDAMLKMLNE QSRLFNDAVQSFEYIQMGSNFGQSFQTSLLKLDVVRLKLTRWGQSVGLANVDDGVKQLQMTNLAPEDQEQ VQDLLSQILELFAEAEAASKRLRRRNPNLKVLDPAEELDGVSAP…
EAA64855	Aspergillus nidulans	AN2023	SESB			PP - motif	MSIRAVREPANAKVDIVFVHGLHGDQAPWTSASDVFWPEKLLPGKISDACILSFEYEAAIGLFFDEDDEI TDISSDLINELMDHRTEKEKALVRAAEHPRKRELIGCIHGILLLGTPHFQPGSVAAATKYLQVAQAEIPS ESDLKDRLYRLSGIPQRFAELKQAGAEFEVEGFYAGAGTKLGSTGKDVKIVDEALARGPDAPPPERLARN QLRLSQYDGEDDKDFKKVVRVLTQWASKIVLPEEDKGAANVSNATFSGSHNSGLQLGQNVAHHARVPPRK ADYID
EEA22327	Penicillium marneffei	PMAA_061060	HeLo; Goodbye			PP - motif	MAAQIGNDAGQASDLAQLWQSAVEDYEKRTKKSLRLAQLSNIDQIMKGTEGLSDEFKDFRHDRSKTDNMR TAFKNNLWLIQKIVNTVQVVGNAASAFPPAMPASLIFTAFGQVMQSFATVSADYDKIMGFFDFTHRFFDR LSMIENKTPQQKPFQRCVARVFSGMLTICSIAQEYAERKRFKKWFSSLMDGSDGALSGAINNMEEAVNEL AQAVGLATLRTVEILDDIVQSMNGNVEFLVAKVTFIDERTAAIKSDTGIIIEQNRELESKQDAMMETLNE QSRMFKDAVQSFGYIQMGANLDKSFQTSLLKLDVVRLRLTRWGQSVGLVNANDVKSLQITKLAPEDREQV QGLLDQILELFVDAEATSKRFKKRNGNSTTPVLDPAKELDSVSA…
EEA22326	Penicillium marneffei	PMAA_061050	SESB			PP - motif	MSIRVIREPANAKVDIVFVHGLHGDQAPWTSEADVFWPEKLLPAKVSDACILSFEYEATIDSFFDEEDGI TDISNDLINELMDHRTEKEKEERPIIFVAHCLGGTVLENALVRAADHPRKKELVGCVHGILLLGTPHFQA GSLAAATKYFQLAQEEIPSESDLKDRSQRLTAIPVAFAGLKQAGADFEVEGFYAGAGTKLGGKDVKIVDE TLARSLEAPPPERLARNQLRLSQYDAEDDKDFKKVLRILTQWASKIVLPEEDKGAQNVSNTTFSGSHNSG LQLGQNVGTLKGFSFGRS
EEA22328	Penicillium marneffei	PMAA_061070		NB-ARC	TPR	PP - motif	MASTASFYGTNHGFQLGYNSGTIGPITIENHLPPGKFSEMCYELFADSRSWKERPETPPPPSSTVPFRRD PDFVDRGTLLDRILEKGSASPSRIALVGLGGVGKSQLVIEYSYQVRDRSPDTWVFWVHTSNAARFEQSYR EIADRVKIPGRKDPKTNIFNLVSEWLHNEGKGKWMLILDSIDDDRFLHEIPLSSRDESDSRIPAQPLFNY LPLNAHGSIIITTRSRGVAAKMVEDGDIIAVESMDQIHAQTLFEKKLGKQENQEDIIELIAALEFMPLAI VQAAAYIKQRAPRSSVKQYLTEFQKNDYRKMSLLDYKGGQLRRDQEAKNSIILTWQISFNHLRQERPTAA DLLSLMSFFDGHGIAEFLLYDRNQKGTNHDSMENETSDKDEISA…
EED16285	Talaromyces stipitatus	TSTA_013840	HeLo; Goodbye			PP - motif	MTTSDLSQLWQSAIQDYETTTGKKLLLSAQPFTNMQDVMLGTEELSLKFKSFRDDKSKVSKMRTAFKNNM WLIQGIVNTVQSVGNAASAFPPAMPANLIFSAFGQVMQSFADVSADYDKIMGFFEFTHRFLDRMSIIDQK LPDMPQFQRCVSRVFSSILKICATAQKYTAEKRMKKWFDNLLNGTDGALTSATTELEEAINELSQAVGLT TLRTIQIIDETTQAMNGNIDFLVSNAHLIDERTRTIESNTDTIIDQNRGLASKQAEMTDMQRETLQEMAQ QSRLLGNIVGYFGSIQMGEKFGRKSFQDSVLKLGVVRLRLTRWSQAVGLNKELDNVESLSSVKISEEDLP MVKELLGRIMESFDDAERTSSRIKKRNPSLSSGSVLDPAKELDD…
EED16284	Talaromyces stipitatus	TSTA_013830	SESB			PP - motif	MSINIIKDPSDARLDIILVSGLKIDQKDWTSAENSIFWPEKLLATQIPKARILVFEYDEDLTLDVFWNKR DLISSNSDDLVNSLMDERRGEKAERPLVFIAHCLGGLVVENALMRANKNEKKRQLVTCAIGLLLLGTPHY QSATLSQAKKYFQLAQKDVPSDSDLQALSKHVLAIPQSFAEFIQSNPINVESFYEGAPVIIADDQEIELV EESLAKLPGDFPDPTMLKGNHHSMSRFESERDKDYKNVSRVLADWVEDLPQPEEKGTTNNISNASFSGST NYGYQLGQNTGTQSGFTFGAR
EED16282	Talaromyces stipitatus	TSTA_013820		NACHT	ANK	PP - motif	MRRLGSKVDKPAPAPSADFSQSENKGLQMGQNYGNLEASFYSDSILGVNIAAGASVYMGEKKTVEDKLLD VLIAGDGKDRCDIGRPEPGTCGWVFEHEAFRGWVSSGTATHPPLYIQGTAGSGKSVLLKFLAKELEKRMR VRTPSTSSPVEEALPLELGVPGKTIAAICFCDDKNEMRRKPIWILRTLLYKTVQQNRDLAKYALKHLQSA EDLDSPGADPDEFHSVDVLQKILQDIVSDSELEVLYFIIDGLDQCGPHLPAVVRLISDISTSVNKEAASR GAKFRLRCIISDRGSKIVRDKLLPQHIIDMPKDNRHDIDKVTEKKIKDIQDYREFSDDVLKSTIDLLKES CKGMFKWLSLVLEDLSTWDGAWTEIKVKERLHNIPSDVATYYKT…
XP_003188845	Aspergillus niger	ANI_1_2236094	HeLo; Goodbye			PP - motif	MASNGGSSVAQLWQDAIAEYENATGKNLRLGQFKSMDEVMAGTEGLSNNFSNFRSDKSKVSKMRTAFKNN MWLIQDIVNTIQSVGNAASIFPPAMPATLIFSAFGQVMQSFSTVSADYDTVMGFFEFTHRFFDRLSIIDQ KMPELPPFQRCISRVFSSILRICAIAQKYTKEKRFKKWFDSLLKGNDGELAAASEELETAINEMSQAVGL STLKTVDVMNRVVDSMNGNVEFLVSNSNLIDERTAAIQSNTDAIREQNRDIASKQDDMTDMQREMMRQLS EQSKLLNQAVGFFDSLQIGESFGKEFETSLLKVDVIKLRLTRWGKSVGLANLDDLGSAREIKLAPEDIPK VQDLLNEILELIADADKLSGRFKKKNPAALTMDPFVELDNTAAS…
XP_001394698	Aspergillus niger	ANI_1_2232094		NACHT	ANK	PP - motif	MRVPGSKTEPEPVPAPTADFANSENKGLQMGQNYGHMEASFYSDAIQGINIAAGASVYMGERKTAEDKLL DALIGRDPEDRKDLRDAEPGTCEWLLDSAPFQQWIEKNPAETGPLYVAGIPGSGKSVLLKFLAKEVARQK RVGSPGSSPVKKPLLSLGPTGKTMAAACFCDDRNDHRQTPIWILRTLMYRLFNQDRNLVKHLQKHIQKVE DLDATGSDPAEFQSKDVLQKILEELIPDPEVEVVYFIVDGLDQCGQYQNDVVFLIKELTKNINDEAVKQG EQFSLRFIISDRGSSIVRNVLHPEYIIDMPTDNQPDIEQVTDKSLKCIQEYRGFSDSILHFTTSLLKKNS KGMFMWLSLILGDLRSWDGTWSERKIEHKLHSIPLDVAAFYKAM…
XP_001394699	Aspergillus niger	ANI_1_2234094	SESB			PP - motif	MSIKTIKDVSEARVDIVFVHGLETDRKSWRTEDDVFWPATVLPKLVNNARILAFESDDITVDTIWNTEDL MTDVSDELCDELVGVRNGDVAKRPIIFIAHCLGGLICEHALVRAANDDDKKQVADCTLGLMLLGTPYYSP ANISEATKYFRLAQQDIPSPEDLQAMSQYVLEYGQEFDQFRQTAPLKLKIFFEGAPTKVNGEEFKVVESA VVALPDTQKQLVRIGYSHHGMSCFKDENDKEFKKIFNPLKSWLGSLPSPEEKGTVNNISNASFAGSNNSG LQLGQNAGALNGFSFGR
XP_003190453	Aspergillus oryzae	AOR_1_1036094	UDP-Pho			σ - motif	MGITKPSHDDYTIAWICALPLEMAAAKAMLEKTHESLPQPQADQNSYSLGEMSGHNIVIVCLPSGVYGTT SAATVLSQMLSTFSSIKVGLMVGIGGGVPSESVDIRLGDVVVSMPSGSSGGVIQYDYGKALSDGCFQRTG SLNSPPQVLLTAVSQMRSNHMIKGSEIYATITNTLDSNRYMGEHFSPPDRDLLFNATYQHPKHCLDCSKC DQSQVVTRISRKSHEPQIHYGLIASGNQVIKDAKTRDYLAQKLGTLCFEMEAAGLMNQLPCLVIRGICDY CDSHKQKDWQGYSALSASAYAKVLLTVVPISSSNRTDARIHMQSNKEAKRSEAASFTFNSYGSGQQFNAT GNAQNNNTGNGNQFLGSFAGPVYFGHPPTASKDT
XP_001824279	Aspergillus oryzae	AOR_1_1386094		NACHT	ANK	σ - motif	MSFTNDHGSGDMFNSHMSTQNNNTGNGNQFPGSNFPGTVNFYQSTQNERSLQSRQMDVLKRLNVSKYRDQ KDRNPVRVRGTCDWFVTHPTFRAWQETQTSQMLWVTADPGCGKSVLAKYLADSVLTSHAGRTVGYFFFKD DFEDQRSIVKALCCIFHQLFYQNRDLLTAHIIEQFEMDERIVDSFGSLWNVLISAAKQTDTTEIICLLDA FDECEPDGRSQLTVALERLYTDESRHNFNLKFLITSRLYGDIRQGFQPMQMEGQPLIHLSGEGTEEMEDI SREIKTFIKARVETIGARLKLTEEEKSILLKSVTRVPNTTYLWVYLTLNLIENIKDIDKTRILDATSDLP KTVDDAYERILSRSEDCQKARKLLHIVVGATRPLTLQEMNLALI…
XP_389346	Fusarium graminearum	FG09170	SESA			σ - motif	MDSIIPLIDNTILLLSSAEKAYEKVQNDNQLKVSFHSAGEGLVDVISALQSIKPLIGSANSGGDIEAAET SVRECQKKAKLSKRLFVHIAEAPPNKRLHGYMTYLALQDDDQMAEILQAGVAETIKSSLKKLAWAIEELD EEISKQKTNEKAGTVHHSGVGDLYSAKDAATQINNTGTGNQYNGTDKSH
XP_389347	Fusarium graminearum	FG09171	NAD			σ - motif	MKSISSTFKAAFRRRSKLRPDKDAGTMIVSMSESRQESSNSELPIPDTNIVSTVPTIESTTQLEGVTSQA LSNIRQEDISLWNSAYERLKETSEKVVTEYEELLSKELSSEIDISEDESENHIDDTNHDRRKEKLELIIQ NGLRRTEEGKTKYKIFGKTFIPRYHIARTAEFVQSVKTLVDEAVKASPEAGLVWAGVCTVLPILINPSSA ESAQQEGFTYVTSRMRFYGELERYLWPARLEMAFGLKREVLDELIGLYQHILEFQITLVVQLYKTRLARL KHDIVNHDTWNSMVSKLKQQEAIFDTDLKKINDLALRMEFQKLNENAEKFFDDLKSKLSSPPEIQRAATN HHSGFGDQFNASGGAMQTNNTGDGDQYVGVSFYGSAGFGRT
XP_389348	Fusarium graminearum	FG09172		NACHT	ANK	σ - motif	MSHQNLGTEFKAEGDCEQYNSHGGGDQHNHVDRSDRRQATINNYYGIYLPKHNPALAGVLGGSGKSILIS LIIHSMLQKAQENSKLACVYFYFNHGDTLQPSVSQLWAALLEQLLEQNSDENIAQEVQSIFDRSRYGVIS IPPIEYFNLFKAQAVLFETVYLIIDSLNICADYNDDTSHQTLLETFQKLPDNVRVIFSSRDGSLANHLLV QKKIKVKPQAADIETYVNDRIKTSRKLRLQQDKSFMKDLVKSIIHQTEESQMFDHPISIVSKLTIGRFLI ARSYLDRLNEDAFRANIKDMENSLPEDNCELSRFLQPSFRRVEQAKDWDKALARHVLTWTTHAREDPTAE LVIESFKLSSWHSSKYQDLTLDAESLLPVCHGLVTLDHQKGTLR…
EFQ99181	Arthroderma gypseum	MGYG_02195	SESA			σ - motif	MSADDLSSLISTTIEVLESAAAFYKRAENDTTLRKAFHAAGQGLPLITDALQATNDALNGRDLSSAAKRA LGACSANANIAEDLFRDVARAPAASKYERYTTAVKRQGHKVESVVVGMMKDVCQMAKDNAIQEAMQPHVK KLDEAVENLSKMEPSVPEEQRSGYSFTNSGSGDQFNALGGSQHNNTSSGNQFLGSIGSVHGMRAPEEKQ
EFQ99180	Arthroderma gypseum	MGYG_02194		NACHT	ANK	σ - motif	MARPQSSRGDTYENKGLGDQFNTPGGTQYNYTGSNTTVNNYHDIKPPKALQERCLESLRFSGIDDRLNSM EDAAEGTCEWLIQHKKYKNWASRDRSLLWIKGKPGSGKSTLLQYALKNAEKTPNIGESNPIFLSFFFYDR GNTEQKTPLGFFQSLLYQLLCKAPDAMGELLTAFEERENKGEHGVMWHWYQKELHALFESSLRDILKIRP IWLFVDALDECTEPDMAMFIQKLKLGFQQLPPTSLPCRVCFTSRQHSFQNQISDLDVESEISVESHNGRD ISTYVTSRLSIASMLSIAEKKAVAEKITERARGIFMWARLVVVRVLELEPYEPTEAIVEEIMNTSQDLYD LYAKLIEKVKGNPGSLKLLQWICFAKRPLSLDELRWAMAVDADI…
EFE34609	Arthroderma benhamiae	ARB_06372		NACHT	ANK; WD40	σ - motif	MSTLDIDLKRRPSDDLANSAKSLRLEDKKDNQYNNDGDGSQYNNTSTGRQYVADQINITENRIDKGENLE FLKDLRLTDPRDDKSRILDTKGGLLTKSYEWIVDFGDFKKWRSDQGSGVFWISGSPGKGKTMLLCGIIDH LSNPGVKHIPPSFFFFQEGDSQLNNATTMLRGLIYLLALQHRSFLEYLQERYSLSGGTLFADPENFFALS NVFRNMLSIQTTKPIYLIVDALDECQTDLRKLLDLICQTSSTPSNCVKWIVSSRNLYDIKEVLGPFEHKV YLSLDQNDALISTAVNTYIDHKVGQLSRAKGYSRAVQEEVRKYLKENANETFLWVALVCQRLSGIKPWNT RAELHKFPPGLQDMYGVMLGQMLKLDDNDLDFCKSILAIAMIAH…
EFE34608	Arthroderma benhamiae	ARB_06371	SESA			σ - motif	MRSTKFDDLISGTIASLGAAAGAYDIMKNDVDLPATFHKGGQQICRVQQALQAIVNIMKWRDLAGDIMQI IPSLEDSSKKAKALEEILSETASQPESSRKNQYVTAVRNKGPENTIEALLLGMMRNTVVLAEDEAIKGAV EEQVRGLHGAMEELSAMEPSVPVEAGESRFSHFGSGSQFNNAGSGKQFNNTGGGRQYQAEVMYFKD
EFE37924	Trichophyton verrucosum	TRV_07414		NACHT	ANK; WD40	σ - motif	MSTLDIDLKRRPSDDLANSAKSLRLEDKKDNQYNNDGDGSQYNNTSTGRQYVADQINITENRIDKGENLE FLKDLRLTDPRDDKSRILDTKGGLLTKSYEWIVDFGDFKKWRSDQGSGVFWISGSPGKGKTMLLCGIIDH LSNPGVKHIPPSFFFFQEGDSQLNNATTMLRGLIYLLALQHRSFLEYLQERYSLSGGTLFADPENFFALS NVFRNMLSIQTTKPIYLIVDALDECQTDLRKLLDLICQTSSTPSNCVKWIVSSRNLYDIKEVLGPFEHKV HLSLDQNDALISTAVNTYIDHKVGQLSRAKGYSRAVQEEVRKYLKENANETFLWVALVCQRLSGIKPWNT RAELHKFPPGLQDMYGVMLGQMLKLDDNDLDFCKSILAIAMIAH…
EFE37925	Trichophyton verrucosum	TRV_07415	SESA			σ - motif	MRSTKFDDLISGTIASLGAAAGAYDIMKNDVDLPATFHKGGQQICRVQQALQAIVNIMKWRDLAGDIMQI IPSLEDSSKKAKALEEILSETASQPESSRKNQYITAVRNKGPENTIEALLLGMMRNTVVLAEDEAIKGAV EEQVRGLHGAMEELSAMEPSVPVEAGESRFSHFGSGGQFNNAGSGKQFNNTGGGRQYQAEVMYFKD
EFE37926	Trichophyton verrucosum	TRV_07416	SESA			σ - motif	MSGIEVIGLISSIISIVDTAVKIHNALKDADRLPRAFQEVALRLPVVTDTLTAVKGHLEENGVDEATFRA IMPVVQACGENAEALKDMLQEVTVSPDHSRLQRYRLAIRRLGKGSQVEELMKALLENVQLLAGNRAMQSA TGAQVGEVLEAIHALSEVPPSAPDTPGSMTFSHYGTGSQFNNADSGTQNINTGSGRQYVANSMTFGAD
EGE01227	Trichophyton equinum	TEQG_00280		NACHT	ANK; WD40	σ - motif	MSTFDMDLKRRPSDDLANSAKSLRLEDKQDNKYNNEGDGSQYNNTSAGRQYVADQINITENRIDKGENLE FLKDLRLTDPRDDKSRILDTKGGLLAKSYEWIVDFGDFKKWRSDQGSGVFWISGSPGKGKTMLLCGIIDH LSNPGGKHIPPSFFFFQEGDSQLNNATAVLRGLIYLLALQHRSFLDYLQERYSLSGGTLFADPENFFALS NVFRNMLSIQTTKPIYLIVDALDECQTDLRKLLDLICQTSSTPSNCVKWIVSSRNLYDIKEVLGPFEHKV YLSLDHNEALISTAVNTYIDHKVAQLSRAKGYSRTVQEEVRKYLKENANETFLWVALVCQRLSGIKPWNT RAELQKFPPGLEDMYGVMLGQMLKLDDNDLDFCKSILAIAMIAH…
EGE01228	Trichophyton equinum	TEQG_00281	SESA			σ - motif	MRSTKFDDLISGTIASLGAAAGAYDVMKNDVDLPATFHKGGQQLCCVQQALQTVVNLLKWRDLAGDIMQI IPSLEDSSKKAKALEEILSETASQPESSRKNQYVTAVRNKGPENTIEALLLGIMRNTVVLAEDEAIKGAI DEQVRGLHGAMEELSAMEPSVPVEGGESRFSHFGSGSQFNNAGSGKQFNNTGSGRQYQAEVMYFKD
EGE01229	Trichophyton equinum	TEQG_00282	SESA			σ - motif	MSGIEIVGLISSIISIVDTAVKLHNVLKNADRLPQAFQEVALRLPVVKDTLTTIRGHLEETGVDEATFRA IMPVVEACGENAEALKNILQEVTVSPDHSRLQRYRLAIRRLGKGSQVEELMKTLLENVQLLAGNRAMQAA TGAQVGEVLEAIHALSEVPPSAPDTPGSMNFHHYGTGSQFNNADSGTQNINTGSGRQYVANSMTFGSD
EGD95926	Trichophyton tonsurans	TESG_08418	SESA			σ - motif	MRSTKFDDLISGTIASLGAAAGAYDVMKNDVDLPATFHKGGQQLCCVQQALQTVVNLLKWRDLAGDIMQI IPSLEDSSKKAKALEEILSETASQPESSRKNQYVTAVRNKGPENTIEALLLGIMRNTVVLAEDEAIKGAI DEQVRGLHGAMEELSAMEPSVPVEGGESRFSHFGSASQFNNAGSGKQFNNTGSGRQYQAEVMYFKD
EGD95925	Trichophyton tonsurans	TESG_08417	SESA			σ - motif	MSGIEIVGLISSIISIVDTAVKLHNVLKNADRLPQAFQEVALRLPVVKDTLTTIRGHLEETGVDEATFRA IMPVVEACGENAEALKNILQEVTVSHDHSRLQRYRLAIRRLGKGSQVEELMKTLLENVQLLAGNRAMQAA TGAQVGEVLEAIHALSEVPPSAPDTPGSMNFHHYGTGSQFNNADSGTQNINTGSGRQYVANSMTFGSD
EGD95927	Trichophyton tonsurans	TESG_03388		NACHT	ANK; WD40	σ - motif	MSTFDMDLKRRPSDDLANSAKSLRLEDKQDNKYNNEGDGSQYNNTSAGRQYVADQINITENRIDKGENLE FLKDLRLTDPRDDKSRILDTKGGLLAKSYEWIVDFGDFKKWRSDQGSGVFWISGSPGKGKTMLLCGIIDH LSNPGGKHIPPSFFFFQEGDSQLNNATAVLRGLIYLLALQHRSFLDYLQERYSLSGGTLFADPENFFALS NVFRNMLSIQTTKPIYLIVDALDECQTDLRKLLDLICQTSSTPSNCVKWIVSSRNLYDIKEVLGPFEHKV YLSLDHNEALISTAVNTYIDHKVAQLSRAKGYSRTVQEEVRKYLKENANETFLWVALVCQRLSGIKPWNT RAELQKFPPGLEDMYGVMLGQMLKLDDNDLDFCKSILAIAMIAH…
EFE34607	Arthroderma benhamiae	ARB_06370	SESA			σ - motif	MSGIEVIGLISSIISIVDTAVKIHNALKDADRLPRAFQEVALRLPVVTDTLTAVKGHLEENGVDEATFRA IMPVVQACGENAEALKDMLQEVTVSPDHSRLQRYRLAIRRLGKGSQVEELMKALLENVQLLAGNRAMQSA TGAQVGEVLEAIHALSEVPPSAPDTPGSMTFSHYGTGSQFNNADSGTQNINTGSGRQYVANSMTFGAD
EGD85579	Trichophyton rubrum	TERG_08708	SESA			σ - motif	MSGIEVIGLISSIISIVDTAVKIHNALKDADRLPRAFQEVALRLPVVTDTLTAVKGHLEENGIDEATFRA IMPVVQACGENAEALKDILQEVTVSPDHSRLQRYRLAIRRLGKGSQVEELMKALLENVQLLAGNRAMQSA TGAQVGEVLEAIHALSEVPPSAPDTPGSMTFSHYGTGSQFNNADSGTQNINTGSGRQYVANSMTFGAD
EGD85580	Trichophyton rubrum	TERG_08709	SESA			σ - motif	MRSTKFDDLISGTIASLGAAAGAYDIMKNDVDLPTTFHKGGLQIYRVQQALQAVVNIMKWRDLAGDIMQI IPSLEDSSKKAKALEEILSETASQPESSRKNQYVTAVRNKGPENTIEALLLGMMRNTVVLAEDEAIKGAV EEQVRGLHGAMEELSAMEPSVPVERGESRFSHFGSGSQFNNAGSGKQFNNTGSGRQYQAEVMHFKD
EGD85581	Trichophyton rubrum	TERG_01851		NACHT	ANK; WD40	σ - motif	MSSLDMDLKRRPSDELASSAKALRLEDKKDNQYNNDGDGSQYNNTSTGRQYVADQINITENRIDKGENLE FLKDLRLTDPRDDKSRILDTKGGLLAKSYEWIVDFGDFKKWRSDQGSGVFWISGSPGKGKTMLLCGIIDH LSNPGVKHIPPSFFFFQEGDSQLNNATAVLRGLIYLLALQHRSFLDYLQERYSLSGGTLFADPENFFALS NVFRNMLSIQTTKPIYLIVDALDECQTDLRKLLDLICQTSSTPSNCVKWIVSSRNLYDIKEVLGPFEHKV YLSLDQNDALISTAVNTYIDHKVNQLSRAKGYSRPVQEEVRKYLKENANETFLWVALVCQRLSGIKPWNT RAELHKFPPGLEDMYGVMLGQMLKLDDSDLDFCKSILAIAMIAH…
EAU30333	Aspergillus terreus	ATEG_09196	UDP-Pho			σ - motif	MREDQPVDRCVFDIALICALREESDAVEAAFDCFFEDDELHYEKVAGDPNSYTFGKIGAHHVVLAYTPGM GKASSASLAASFRASFPNIRLGMVVGICGGVPQPAEREKVFLGDIIISTGVVQLDFGRQYADQFVRKDTI QDNLARPNSEIRGFLHQLQGWKARGHLQQNISRNISEICAKEGFASWVRPTAVHDRLYRADYDHIHRDPR ICSVCAQSSGSLVVCERARISSCEQLGCDQSQLIQREKSTGDTAAIHFGRIASGDQVMKSAADRDRIANQ EDIVAFEMEGAGVWDNFPTIMVKGVCDYADGHKNKQWQKYASVAAAACAKALLQKWRVTEPSITSRSSTR MAEGHRPETGAVNDFDKGVVFNNHAQVANQGVQQTFHGNVSFYH…
EAU30332	Aspergillus terreus	ATEG_09195		NACHT	ANK	σ - motif	MAANREMCSPLTSFNNLDAVSFQGVHQTINANSIILSDGPRAENIRIDEEVLSSLAFPEMHQRKDNVEKP YMNTCNWILELKEFKDWMNGSNGLLWIKGKPGAGKSTLMAFLYGQFIKPGPAKPGITLEFFFSARGTELQ HTPLGMLRSLLNQLYRRDPDIRPAVRKIYQDKCDAFGRSKKSWEWQQPELERILHELIVTSARKQSLTVF VDALDEAGQKSAQRLVRYFHQVNESIARVSALGKLCISCRHYPVIARISGTEISVDEYNHDDITAYIRDF LSLDCLFAPETADHQSWDSVITYLLRSAKGVFQWICLVVPLVERKIQDGESPENVRRFLRRVPGELRDIY EYILRNVIEVDYRSHSYLLFQWVCLAERPLSATELRYAISAMHI…
EDJ94744	Magnaporthe oryzae	MGG_10548	UDP-Pho			σ - motif	MPPQLDPEIYTVAWIAPLEIEARAALHMMDCLHPDRFPMGRGDDYVFRAGECGGHNTVIATLPAGQEYGT GSAAALASQVKKFFPNLWFGLLVGVAAGLPNLTRDPPRDIRLGDVLVALPDGESAGLVAYDLGKETAESG FQLLRHGQVLATTETVIRSAIGNIKLDAPDDATYCLEFYETIKTKEHGAPTFDDPGQEHDKLYTTGEDGG EKLVERELRPISQRIRVWYGRIGSGEKLMKDARKRDQLRDAYDLIGLEMEAAGTMNRIPVGVIRGVCDYG DLHKNKRWQPYAAAMAAAYAKVVLGAIPPKASSASIPTAPSPVASPPHAVFHGPITGKKVIAGTSIQGTN TINFY
EDJ94745	Magnaporthe oryzae	MGG_10547		NACHT	ANK	σ - motif	MADTNPIQSFGSTAATNAFVGNQFSGTTHINVNQASVVACFRSLAFRDIDARQNDIAPPHPETCEWLFES PEFQQWQGPGCRDTHNGVLWIKGKPGAGKSTLMKHAFRRFQRDLFRHHTIVAHFFNARGDRLERTALGLL RSMPPRPILLLIDALDECDDDEVRNMIHFLESLSLEPSRADKQLQMCLSSRHYPAIRMNKFVELAVEGNQ DHREDIAKYTRKWLRGNDKEMEAEIVQRASNVFLWVVIVVSLLNKAYDEGRIEGMKRILEEIPDGLERLF STILGQDVPEKAVTLRMLQWVLLSEEPLTAKELFAAAVGIPLPSREVIKRRITTSSKGLIEVRKGERGTV QFIHLSVKDFLFRKKILQTLDPSLGPEPIMASHGRLWRCCWQLV…
EFY96194	Metarhizium anisopliae	MAA_08305	SESB			σ - motif	MSRPRTSRSHRLPSGNSPNHEAQNAVVGYERSGGSADSRLSSINAPDQSFPDGVEVLRDCHDALVDICFV HGLTGNRNSTWTARGQSEPWPKTLLPKNLGKARIITYGYDAYFVRKSVASQNGLSEHARNFLSDLTTDRD LSNASSRPLLLVAHSLGGLICKEAILLSRNNPEEHLKAMFHCTKGILFMGTPHRGSWMADWASIPAWALG TVKSTNNFLLQVLKTNDRHLKSVQDNFWSMIREQQNNGRDIKVTCFFEELAMPVVGKEVVPKDSATLEGY HALSIHANHSDMVKFSSADDNGYRRVLGELDRWYKRIKDPDTHQVSQPMNQGRAREHASFSFHNSGSGDM FNAPGGTVNNWQRP
EFY96195	Metarhizium anisopliae	MAA_08306		NACHT	ANK	σ - motif	MESRYYDIDAAQTGTCEWLSQHKMYREWVERNRGLLWIKGKPGSGKSTLLRHALDDAKKKRNVKENLLIL SFFFHGRGTELQRTPEGFYRSLLHQLSKTPDAVSDVVSTFQEKCETFGEVGKAWQWHPKQLRELFESSIR EALKLRPICLFVDALDECGEKDATMLAQRFKDLLDSLRSTAYNSFHICFTCRPYPIVALDSEFEICVEEG NGTDISNFVGHQLSELEPTILPRILNLITERANGVFLWASLIVKEIVSLNLKTTKSEEMEDAILQVPQEL DDLYRKLIEEMGSDSVLLIQCICVAMRPLSIADWRWAMAMKTDYPYSSLQQCQYSPDYKPDDKSIKKEIQ TLSHGLIEVTSNKTIQFIHQTVKDFFVENGLWLLKPLGSVPVGI…
EED12256	Talaromyces stipitatus	TSTA_003180	UDP	NACHT	ANK		MTIQRSHRDYTIAWISALPLEMAAAKAVLDEIHCALPQSSTDRNAYTLGRLCDHNVAVACLPSGIYGVTS AATVLAQMLSTFSSLRFGLMVGIGGGVPSKFDIRLGDVVVSKPNRTENGVIQYDLGKTLSGGRFQRTGSL NKPPHELLTAISQIDSDQMMGKQQVQQIIHDTLAKNEQIRGQFSRPPDDWLFCGTYDHKTITDDCSACDR SQLVSRAPRPTDEPQIHYGLIASGNQVMKDAKTRDLIAQELDILCFEMEAAGLMDQLPCLVIRGICDYCD SHKSKQWQGYAAVTAAAYAKGLLKVVPVADHKAQQEQHVSLTEEEKSCLQSLFITDPAEDRNALKRRKGD RTPGTCSWILETDELKHWLALNQPADQEETRILWLRGNPGTGKS…
EED44734	Aspergillus flavus	AFLA_114360	UDP	NACHT	ANK; WD40		MATMKPSHHDYTVAWVCALPLEMTAAELMLKEIHDPLPQPPTDPNAYTLGKLGEHNVVIACLPSGVYGIT SAAAVLAKMHSTFPSLRFALMVGIAGGVPSRSTDVRLGDVVVSIPSGTSGGVVQYDFGKTLPDGRFQRAS SLNKPSQLLLNTVSKVRSKYAITEADIDGTISRILNTNERLKQQFSRPHRDWLFNAEYIHEGNHPDCLEC DQTQLVKRASRDSSEPHIHYGLIASANQVMKGAKARDSLAQDSNVLCFEMEAAGLMDQLSCLVIRGICDY CDSHKNKEWQGYAALAAATYTRLLLAAVPSQENISHRNYALAQVNETLIRRQIAALRNLYVSLYQDQKNR NPDRTPGTCEWFISHPIFQDWESSQTSRLLWVSANPGCGKSVLA…
EAW16767	Neosartorya fischeri	NFIA_001140	UDP	NACHT	WD40		MPSFTPDDYTIAWICALPLEAAAARAMLDKIHTPPQWSTDPNAYELGELNGHYIVIVLLPAGVYGTVAAA TVVSDMLSTFPGLRFGLMVGIGGGVPGKQNNMRLGDVVVSKPGVKHSGVMQYAYGKAVQSGQFEQTGTLN KPPQILLTHMNQLQAKHMTGGEDVSQIVQQVLERYPNMKKSFCPPGYDTDYLFQPSYHHASRDNDCGKCD KQQLVERQPRDTKAPHIHYGLIASADQVMKDAKTRDRLAQEHGILCFEMEAAGLMDKLPTLVIRGICDYC DSHKQKQWQGYAALAAAAYAKLLLSIVPVEAATAARSRQRYSSEDQRCLQDLLLSHPDDDRRRIEGTKGG LLDDSFRWILASSEYQAWWNSSESQLLWIKGDAGKGKTMLMIGI…
EEA25208	Penicillium marneffei	PMAA_063270	UDP	NB-ARC	TPR		MATSDRRSHDEYTVGWICVLPLEMAAAKVMLDEIHEDLPVSSTDHNTYILGRIKEHNIAIACLPSGNYGL VSANSVAMQLLSSFPSIRFGLMVGIGGGVPNDAADIRLGDVVISKPTDTCGGVMQYDYGKALNGGKFQQT GMLNRPPQILLTALSKMQANHLMAESKIADFIAEIRQKIPGYASQFARPRQADRLYHADYDHVDINSTAC NACDAAQIVSRRARGHDKPLIHYGVIASANQLVRDSQLRNRLSRELGVYCVEMEAAGLMNNYPCLVIRGI CDYADSHKNKEWQGYASAVAAAYAKELLLCIPIMDIDRTRSLEDAVSVRFNLPFNLTGLPAIENFLGRQK ELERLWHHLQPQNSNSRTVAILQGLGGIGKTQLALRFARDHKAD…
EDN26745	Botryotinia fuckeliana	BC1G_06991	NAD	NACHT	ANK		MKFFRRNKPINDAGSASVSKPRTLKSGLRSYLSKKDQKPQPNVGSIPSATKDSPAQGTPHKSNSQSATIP SHHLPSVHEEENIKSLWDCAYDAVKKENPELVTKYEKLLSTELLEKDSEPDEDPLKQAKKTLDETDNIID SKLLNRRAQLKAIITCGQQRMDARKTGLQDTIAHGVEFVLWGKDLIGEAVKASPEASVAWAGVCIILPLL TNASTADKANRDGFAYVTTRMNYYVALEPLLLQVSHDSASVTVNQNLVLEIKKHIIELYQHILDFQFRSV LRFYRSHYKNFGRDSIQHENWSDMKTAIIGLDKNVCKDLGQMNALASTQELENLSMKAHESLLSMQQLLS IAEEQLVVTKENRDILLKQLQTQENFAKKKSTQEEEKCHQVFRL…
EED57051	Aspergillus flavus	AFLA_077460	HeLo	NACHT	ANK		MEPVGLAVGVVGLFGLFNTCLDVVKKHDAWKDFGSESRCLTAQFEAQKLRLQNWGEAVGVEQESVSSKHH ELLGDPRTRSNIQNLLLAIKDICGHEQALSLTTISRVETGSSEGPILTKHGYSLTSRGSKRQRFNWALRG KERRIAQVAQFSSLVDDLHSLVPVNGERGQGSRDTRDFERGDPFMAMRSWLSQLMFHTEALGFIRKKWES TQGQRAARGDVISLLRAIVSAIPECTFTLDGLDECDWAKGSWPGNSDDSITSFLRALRRATAGTSTRILI VSRDEPEIRRGLSNESPYDPVFEHRIIPEDVQNDVLTYCRSIVEEKLSTKTDEAKDEITKKLADRCNGQF LWIRLQQDTLRSGKSQRKLEQAINSTPSGIEHIYERNWMKIMGL…
EFE37059	Arthroderma benhamiae	ARB_04586	Goodbye	NACHT	TPR		MGGEYNQIPNVFQEAIKKYEEITKKPLLDPALLEITSTDALLDKIEKENGKFDDFRSTRHGLFDALECAL KPIELVGNLVSGAASIAFPPSSLVFGSVLYLMDAAKGVSASYNAIKDLMDSLENFTVRLRIYNRELISNE LSKHLSDILVVLIEVFALSRKAIKGGRFLKFARNVLIGNDDKIQEAVGRLAKLTETEHRLVGAETLTETK KTSRAVDDVAINLAATSLTVDKTSHSVSQMSLEVTDMNQKLNNLIQETASSNEISKAEQDRSHQEFIKGA LEPSVTAYDFYDKINKSRVKDTGDWIRNEPFFISWVEKKIPILRVSGNPGAGKSYLASNMITYLNGEYPQ LVQHSSRVSVGYFFFKDDNPKTMSIHQALRDIAYQISQNDPVYA…
EAW19385	Neosartorya fischeri	NFIA_093530	SESA	NB-ARC	TPR		MSGLEVIGGISAIISLLDASIKIYDSARNDIKLSATFEVVRRRLPVLLHILETCKNNLESRKDAIPEDVC EALERCLDACDAKASNLRGIFEKIIPGESDTWEKRYLKVLRKLGKGSRVEELMRSITEDVQVIVNHNAVR SGDPQQKLELENIIQEMNELEPSVPDKNKTMTFHSGGGAQTNNLNTGGGQQINNNAPITTQNFGPVTLRY KEDFSFRGPVGINLGQAPYIASELFVGRGLELDEITKVLCPNHKAQRQQRLVLGGMGGIGKTQLAIAYAE SVRGSYSSVFWLNAVSEAALKDSFRSIAGLIFDIEEPGLLEDKQVVRRVHQWLCTPENTGWLLIFDNYDD LDQFQIDCYYPPASHGAIVVTSRRPDHVAGTPLHIKPLQNVEDS…
EFX04723	Grosmannia clavigera	CMQ_1651	SESB	NACHT	ANK		MWCIKILRKKRGTGPELPFPDGVKVLHDCPDAAVDICFVHGLTGNRESTWTAKGQTKPWPKTLLPQTLSD ARILTYGYDAYVVRAGVAGSNRLIDHAINLLHDLVAERASCGASSRPLIFVAHSLGGLVCKLAILRSRNN AEDHLHGVFDCVKGVVFMGTPHRGAWMADWAKIPVSALAVGKTANTKLLDILQRDNQLLESIQSDFVGMV RELQQSGRRFEVVCFFEEIPLPVFGKVVSKDSATFDGYDPITIHANHMDMVRFASAEENGFKRLNGELTR WKGQIDSSKPAPQLSEIESRCLKSLAFPAMHDRSNDIDRAAGGTCEWLLQHEQYTSWASRDQGLMWIKGK PGSGKSTLLKHALGNQRILSSAKKDDLVLSFFFHDRGDSLQRTP…
EGU75421	Fusarium oxysporum Fo5176	FOXB_14070	SESB			σ - motif	MISADPSSLSHRFFNASSMRKLRAKFLRRKQHRTGDNSPEIHPQQETSHGPPGPPSRHDTDLRPPSENTP VPSFPDGVEVLHSCRDATIDICFVHGLTGNRDSTWTAKGQSKPWPEAFLPLKLTSARILTYGYDAYIVRR SVASTNGLIDHAKNLLNDLSTDRACSNASSRPLVFVAHSLGGLVCKEAVLLSRNNPESHLRGIFDCTKGI VFLGTPHRGSWMADWARIPASALGIVKSTNKSLLKILETDDKYLQSVQDRFWSMVREQQKAGRDLEVTCF FEELPLSGVGKVVSKDSATLESYNAISIHANHSNMVKFSSADDNGFKRLLGELIRWESQIRNSAVRQSRR PIEEAPMTNSSFNNFGPGDQLNAPGGSVNKSTGNGNHFPGATFP…
EGU75420	Fusarium oxysporum Fo5176	FOXB_14069	SESA			σ - motif	MATTVTALISSTITTLEAATDYYNVVKDDKVLCEPFHESGRGLLLVGRALQIAKTQLGGRDLAGDPRSAI DSLKECNANAELSKNIFNAVAESPETSRFDRYKEVVRQEGKGRTVEVLMMGMMNDVRALAENGAIRPGME DQINALHGAIEKLSKMEASVPDEGSDNTFAHYGSGDQLNAPGGTINKSTGSGNHFPGATFSGPVTF
EGU75419	Fusarium oxysporum Fo5176	FOXB_14068		NACHT	ANK	?	MDLHILVRIAVFIDSIEILNSLYYLGTQEHFDPLQECLR SLAFPEMNSRSLDIDAAAEGTCDWLLQHPTFTTWASCNRDLLWIKGKPGSGKSTLLRYVL DHIIEIPNTRKGALIVSFFFHGRGSELQKTPMGLFRSLLYQLLRQVPEALTYIMDTFQQR CETVGKPGEKWQWHPRELPRFFESSLPKVLEARPVWLFVDALDECGQRNAVKLVREFKSL LQGLPFTGSQFHICFTCRHYPILDQTCQFEICLEEENRQDISTYVRAQLSVSYELTASMI PDLITKHAQGVFIWAHLVVDQILDLDNRGAGLREIKNEIYSNPPDLDDLYHDLIRNIDER PASLKLIQWICFAVRPLSLDELRWAMIVDADCPCKSLQECKNAKDYISDSGRMK…	manual annotation
EGU75422	Fusarium oxysporum Fo5176	FOXB_14067		NACHT	ANK	σ - motif	IPNTGEGALILSFFFHGRGTELQRTPLGLFRSLLHQLLCQVPEALTDLVTTFQQRCETVG KPGEKWQWHPRELPRLFESSFPKVLRTRPVWLFVDALDESGQKNAVRLVREFKSLIQGLP STGSQFHICFTCRHYPILDQTCQSEICLEEENRQDISTYVRAQLSVSRELTTSTIPELIT KHAQGVFIWAYLVVDQILDLDNGGVGLRKIEDEIYSIPPDLDDLYHDLIRNMDEKPASLK LIQWICFSVRPLSLDELRWAMIVDADCPHKSLQECKNAKDYISDSGRMKRRVQTLSRGLI EVTSDAKVVQFIHQSVKDFFTEKGLLALDKTTNPDFVVEIAHHRLSRTCIRYLAMEEIGR SASHEPDRLKSEFPFLHYATTSWVT	manual annotation
	Fusarium oxysporum Fo5176		SESA			σ - motif	MAATVTDLISTTITNLEAATRHYSVVEGDKG LREAFHEAGRVLLLVGGTLQAAKTQLSGRDLAGDPQSAMDSLKECSANAELSKNIFNAVA QAPETSRFERYKEVVRQEGKGRTVEVLMMGMMNGVRALAENGAIRAGMEDQINALRGAIE KLSKMEASVPDERSSNIFAQYGSGDQLNAPGGTVNKSTGSGNHFPGATFSGPVTF	manual annotation
EGU75423	Fusarium oxysporum Fo5176	FOXB_14066	SESB			σ - motif	MISADPSSLSYRFFNASSMRKLRAKFLRRKQHRTGDNSPEIHHQQETSHGPPGPA SRHDTDLRPPSESTPVPSFPDGVEVLHDCRDATIDICFVHGLTGNRDSTWTAKGQSKPWPEALLPLKLTSARILTYGYDAYIMRRSVASTNGLIDHAKNLLNDLSTDRACSNASSRPLVF VAHSLGGLVCKEAVLLSRNNPESHLRGIFDCTKGIVFLGTPHRGSWMADWARIPASALGI VKSTNKSLLEILETDDEYLQSVQDRFWSMVREQQKAGRDLEVTCFFEELPLSGIGKVVSR DSATLESYNAISIHANHSNMVKFSSADDNGFKRLLGELIRWESQIRNSTVRQSRRPKEEA PITKSTNSYFNNFGSGDQLNAPGGTVNKSKGSGNQFPGA…	manual annotation
EGU82782	Fusarium oxysporum Fo5176	FOXB_06703		NACHT	ANK	σ - motif	MERSIDDNPLGSERSRASGEPPLENPQFQTKHPGPSTQNSSFTAYGSGDQFNAPNGNQNITKGPGNQFPG SSFQGPVYFDTTELFDPLRECLQSLAFPEMDSRFHDTNAAAEGTCKWLLRHKKYTSWASCDRGLLWIKGK PGSGKSTLIRYVLDHVMPIPNTTEGALILSFFFHGRGSELQKTPLGLFRSILHQLLRQVPEALTDLVATF QQRCETVGKPGEKWQWHPHELPRLFESSLPKVLETRPVWLFVDALDECGKENAVNLAEEFNALLQRLPSC GLKQFRICFTRRHYPILVLDGVLEVCVEEENRNDISTFVQDKLSSFRGRTSSTIPELITNRANGVFLWAW LVVKRVLDLERKGAGLKKIEAVILSVPQELDALYRDLIRNMGSD…
EGU82781	Fusarium oxysporum Fo5176	FOXB_06702	SESB			σ - motif	MANGLANHATNLLNDLTTDRACSNASSRPLAFVAHSLGGLVYKEAILLPKQPRTTSPGHIRLHQGHRIPG HASQGILDGRLGQDTGFGPWGRQNHQQVVVEHLGDRRHVPPVRSRSVLVYVGKVVSRDSVTLEGYNAISI HANHSKMVKFSSVDDNGFKSLLGELIRWESQIRDSAARQPKRPIAEAPITKSANSSFNNYGPGDQLNAPW GTQNISKGSGNQFSEATFSGSVQFGKEGS
EGU82780	Fusarium oxysporum Fo5176	FOXB_06701		NACHT	ANK	σ - motif	MDRATGEIFASQERSRIGGLQRGTEHTGPSSQGSSFNSY GSGSQYNAPHGTQSISTGNGPQFPGANFQGPTYFGKNSRFRR MVLRASAQGMVPNSLEPISKGLRILVRTAVFVDNIEILNSQYRSGTKEQFD PLRECLQSLAFPEMDSRFNDIDAAAEGTCEWLLRHKNYTSWASCDRGLLWIKGKPGSGKS TLLRYVLDHVMPIPNTRGGALILSFFFHGRGTELQKTPLGLFRSILHQLLRQVPEALTDL VATFQQRCETVGKPGEKWQWHPHELPRLFESSLPKVLETHPVWLFIDALDECGKENAVRL NRDFKSLFRGLPSCGLKQFHICFTCRHYPILDQACPLKICLEDENGQDISTYVRAQLSAS PVLTTSKIPDLVTKRAQGVF…	manual annotation
EGU74390	Fusarium oxysporum Fo5176	FOXB_15097	NAD1			σ - motif	MPDAGFSYLRAYPVQARPRHRYFPPPGSNSPDDWSRFPISAWQPFSHVYSFNTVADAMKLDCLPKWRTIF SYHGKPHTQKSKGHNTVGLSTNPSSHEDASRNPQVLTTQVELLPPEPAASSAIGPTASTAQPESLTLHNY VTPREEPEAVITQSLWDRAYEGLRHKDEQLVDKYEELLSRELPPRTSTQRLEKTNEQIDNTNLENRQEQL KTIIGNGLRRMDEGKTKYIIFGHEFVPRDQIAQAARFVQGMRTLVDEAVKVSPEASLAWAGVCTILPILT NPVAAEEANRDGFTYVASRMRFYVELEHLLWPAGLRLATELRREFGAHLVDLYQHILEFQVRTVLRFYQT RLARLGDDVVKHEVWKGMLSKIQELEMIFDNDLKKINDSSSRME…
EGU74391	Fusarium oxysporum Fo5176	FOXB_15098	SESA			σ - motif	MSRIITLVERTTPILEAAEAEYEKVNKDNKLRLVFHQAGRGLALVKKTLELVKSHLQNRDLGGGLEDAKN SIKACTRKATSAEWMFRQVALAPENSRFGDYNKLLAQEGKQYMVEVLVQGMMKDVCELVKQSGIEERMQD EVEDLRDAINDFGDMVPSAPTEEKGDNFNNFGEGDQFNAAGFAEQNNNTGSGNLFRGGVFNREVNFGGQA PEQKPKGNPKKSD
EGU74392	Fusarium oxysporum Fo5176	FOXB_15099		NACHT	ANK	σ - motif	MKRSTDATSRSPHTASLPSGSEQPQASDDRSRHDLQLYDETEHPRPTLASSSFNNTGPGRQFNTVGGPQY NNTGSGAQYIYTNSHEPTDPVQDCLRSLFFREMDNRYNDKNVKAATGTCEWLLQHETYKIWAACDRGLFW IKGKPGSGKSTLLRHTLDNVKKAPSIGYTSLVLSFFFYDRGNELQKTPLGLFRSLLYQLLEQAPDALLGL VDVFQQYCKSRGKPVEDWQWHLNELQRFFESSLLKVLESRPVWVFIDALDECDGEGAVDLAENFNSMLQN LPSTAIRPLHICFSCRHDRNLDLDFGGRMIDVERENKQDISTYVYDKLSGFLDRMGSTIPKLIIGRADGV FMWTRLVVERVLKLERDGEGPKRIEKEISKIPQDLYRLYDKLVQ…
EGU86408	Fusarium oxysporum Fo5176	FOXB_03074		NACHT	ANK	σ - motif	MEGLLGEIILPQERPRTGGLQEETEHAGPSSRGLFINSHGTGGQFNAPGGTVNKSTGSGNHFTGAKFFGP TYFGTQEHFDPLKECLKSLAFPEIHNRFNDIDAAAQGTCDWLRRHNIYTRWASCDRGLLWIKGKPGSGKS TLLRYILNHAMAISNTGKGALILSFFFHGRGTELQKTSLGLFRSLLYQLLRHVPETLTDLVATFQQRCET VGKPGEQWLWHPRELKRFLEPSLRKVLEARTVWLFIDALDECGKKNAVRLVREFKLLLQELPSAGSQFHI CFTCRHYPILGQACQFELCLEEENRQDISTYVRAQLSVSRELTASTIPDLVIKRAQGIFIWARLVVERIL DLDNEGIGLKKIKNEIYSIPPELDDLYHDLIRNIDERPASLKLI…
EGU86797	Fusarium oxysporum Fo5176	FOXB_02687		NACHT	ANK	σ - motif	MERSTDDNPLRSERSRASGERPLQNPQFQSEWKHPGPSTQNSSFTAHGSGSQYNAPYGTQSISTGNGPQF PGATFHGSVYFSNRFHDIDTAAKGTCEWLLLHKTYKSWTSCDRGLLWIKGKPGSGKSTLLRYVLDHVMEI PNTREGALILSFFFHGRGSELQKTPFGLFRSLLHQLLDQVPEALTDLVATFKQRCETIGKPGEQWQWHTR ELQRFLESSLPKVLEARTVWLFVDALDECGEENAAKLAREFKSLLQGAPSTGSQFHICFACRHYPILVLD GVFEVWMEKENRKDISTFAQDKLSSFRKRMSSTIPDLITEHADGVFLWAGLVVNQVLDLERKGIGLKKIE TEILSVPQELDALYCQLIRNMDSDSLKLIQWICFAMRPLSLDEL…
EGU86796	Fusarium oxysporum Fo5176	FOXB_02686	SESB			σ - motif	MPLWKQHRTDDNAPEIHQQQETSRGHGPPSTPSHHETDLVPTFQSTPVPSFPDGVKVLHDCRDATIDICF VHGLTGNRDSTWTANGQSKPWPETLLPPKLSRARILTYGYDAYIVRNSVASTNGLIDHATNLLNDLTTDR AGSNASSRPLVFVAHSLGGLVCKEAVLLSRNNPEPHLRGIFDCTKGIVFLGTPHRGSWMADWARIPASAL GVVKSTNKSLLNILETDNMYLQSIQDRFWSMVREQQKAGRDLEVTCFFEELPLSVVGRVVSKDSATLESY NAISIHANHSNMVKFSSMDDNGFKRLLGELIRWESQIRNSSTSQPTRSIEEAQMKKPANSSFNNYGPGDQ FNAPHGTQNISKGSGNQFPGGYFLRVCAI
